# Supplementary material for: Laser ablation aerosol particle time-of-flight mass spectrometer(LAAPTOF): Performance, reference spectra and classification ofatmospheric samples
Source: Copernicus journal article supplement (doi:10.5194/amt-2017-338), 2017-11-08
Supplement: Supplementary file 1 [file amt-2017-338-supplement.pdf]

In the supporting information, the contents are organised as 1) tables, 2) figures, and 3) description of some procedures for LAAPTOF data analysis as well as the corresponding equations and uncertainties.

**Table S1: Overview of laboratory generated aerosol particles for reference mass spectra**

| Aerosol particle types                                     | Size/nm<br>$d_{va}$          | width <sup>a</sup> | Morphology                  | Source                                                                           | Generation<br>method        | No. of<br>spectra |
|------------------------------------------------------------|------------------------------|--------------------|-----------------------------|----------------------------------------------------------------------------------|-----------------------------|-------------------|
| <b>1. Particles consisting of pure compounds</b>           |                              |                    |                             |                                                                                  |                             |                   |
| Ammonium nitrate, $NH_4NO_3$                               | 1160                         | 101                | aspherical                  | $\geq 99.5\%$ , Fluka                                                            | A                           | 497               |
| Ammonium sulfate <sup>b</sup> , $(NH_4)_2SO_4$             | 611                          | 79                 | aspherical                  | $\geq 99.5\%$ , Merck                                                            | A                           | 537               |
| Potassium sulfate, $K_2SO_4$                               | 1465                         | 232                | aspherical                  | $\geq 99\%$ , Merck                                                              | A                           | 300               |
| Sodium chloride, NaCl                                      | 1202                         | 133                | cubic                       | $\geq 99.5\%$ , Merck                                                            | A                           | 250               |
| Silica, $SiO_2$ (Glass beads)                              | 2097                         | 44                 | spherical                   | Palas GmbH                                                                       | S                           | 347               |
| Oxalic acid, $C_2H_4O_2$                                   | 1081                         | 322                | spherical                   | Merck                                                                            | A                           | 773               |
| Pinic acid, $C_9H_{14}O_4$                                 | 902                          | 94                 | spherical                   | University of Mainz                                                              | A                           | 683               |
| Cis-pinonic acid, $C_{10}H_{16}O_3$                        | 702                          | 88                 | spherical                   | 98%, ACROS ORGANICS                                                              | A                           | 600               |
| Humic acid                                                 | 1221                         | 126                | spherical                   | 100%, Alfa Aesar                                                                 | A                           | 773               |
| Polystyrene latex (PSL) ( $d_m=800nm$ )                    | 818                          | 3                  | spherical                   | Thermo scientific                                                                | A                           | 235               |
| <b>2. Particles consisting of well-defined mixtures</b>    |                              |                    |                             |                                                                                  |                             |                   |
| Ammonium nitrate & ammonium sulfate<br>(mass ratio = 1:1)  | 1102                         | 165                | aspherical                  | single component samples<br>are from the same source                             | A                           | 454               |
| Potassium sulfate & sodium chloride<br>(mass ratio = 1:1)  | 1375                         | 197                | aspherical                  | as the corresponding pure<br>compounds                                           |                             | 259               |
| Ammonium nitrate & potassium sulfate<br>(mass ratio = 2:1) | 854                          | 112                | aspherical                  |                                                                                  |                             | 576               |
| Hematite                                                   | 1091                         | 817                | spherical                   | Karlsruhe Institute of<br>Technology (KIT)                                       | A                           | 320               |
| Pure sea salt                                              | 1205                         | 218                | cubic                       | Sigma Aldrich                                                                    | B1                          | 422               |
| $\alpha$ -Pinene secondary organic aerosols<br>(SOA)       | 505                          | 84                 | spherical                   | (1S)-(-)- $\alpha$ -pinene (99%)<br>from Aldrich                                 | B1 <sup>c</sup>             | 1938              |
| Potassium sulfate coated<br>PSL( $d_m=800nm$ )             | 805                          | 58                 | partially<br>coated         | Merck & Thermo scientific                                                        | A                           | 609               |
| Poly(allylamine hydrochloride) coated<br>gold              | 400 <sup>d</sup>             |                    | 300 nm core-<br>50 nm shell | Nanopartz Inc.                                                                   | Nebulized<br>without sizing | 417               |
| <b>3. Particles consisting of complex mixtures</b>         |                              |                    |                             |                                                                                  |                             |                   |
| Soot1 with low organic carbon                              | 386 <sup>e</sup>             | 275                | agglomerates                | incomplete combustion of<br>propane, C/O=0.29                                    | B2                          | 617               |
| Soot1 with high organic carbon                             | 120 <sup>e</sup>             | 58                 | agglomerates                | incomplete combustion of<br>propane, C/O=0.54                                    | B2                          | 347               |
| Soot2 Lignocellulosic char                                 | 828                          | 766                | agglomerates                | Lignocellulosic char from<br>Chestnut wood; University<br>of Zürich, Switzerland | S                           | 390               |
| Soot3 Diesel particles                                     | 624 $\pm$ 980 <sup>f</sup>   |                    | agglomerates                | NIST (2975)                                                                      | S                           | 533               |
| Arizona test dust                                          | 1169                         | 874                | aspherical                  | Powder Technology Inc.                                                           | S                           | 261               |
| Saharan desert dust 1<br>(Morocco)                         | 890                          | 1230               | aspherical                  | Konrad Kandler, TU<br>Darmstadt                                                  | S                           | 338               |
| Saharan desert dust 2<br>(Cairo)                           | 1334 $\pm$ 1454 <sup>f</sup> |                    | aspherical                  | Khaled Megahed, KIT                                                              | S                           | 396               |
| Arable soil dust SDGe01<br>(Gottesgabe, Germany)           | 912                          | 392                | aspherical                  | Roger Funk <sup>g</sup>                                                          | B1 <sup>h</sup>             | 583               |
| Arable soil dust SDPA01<br>(Paulinenaue, Germany)          | 787                          | 334                | aspherical                  | Roger Funk <sup>g</sup>                                                          | B1 <sup>h</sup>             | 385               |
| Arable soil dust SDAr08<br>(Argentina)                     | 910                          | 407                | aspherical                  | Roger Funk <sup>g</sup>                                                          | B1 <sup>h</sup>             | 592               |
| Arable soil dust SDWY01<br>(Wyoming, USA)                  | 864                          | 430                | aspherical                  | Tom Hill <sup>i</sup>                                                            | B1 <sup>h</sup>             | 623               |
| Agricultural soil dust<br>(Northern Germany)               | 561                          | 249                | aspherical                  | Roger Funk <sup>g</sup>                                                          | B1 <sup>h</sup>             | 583               |
| Urban dust                                                 | 1329                         | 1266               | aspherical                  | NIST(1649a)                                                                      | A                           | 375               |
| Illite_NX                                                  | 825                          | 260                | sheet                       | Arginotec                                                                        | A                           | 807               |
| Sea salt with skeletonema marinoi <sup>j</sup>             | 1212                         | 338                | cubic                       | Matt Salter <sup>j</sup>                                                         | B1                          | 526               |

- 5 Note: “DMA” is short for Differential Mobility Analyzer; “AIDA” is short for Aerosol Interactions and Dynamics in the Atmosphere; spectra number is the number of averaged spectra. For aerosol generation methods: “A” represents for the method by using a nebulizer and a DMA (refer to setup A in Fig. 1); “B1” and “B2” represent the methods in which particles were sampled from AIDA and a stainless steel cylinder, respectively (refer to setup B in Fig. 1); “S” corresponds to particles mobilized by shaking in a reservoir.
- <sup>a</sup>: These values represent the standard deviation from Gaussian fitting to the measured particle sizes ( $d_{va}$ ).
- <sup>b</sup>: There is only one weak but reproducible peak  $m/z$  30  $NO^+$  in the positive spectra.
- 10 <sup>c</sup>: SOA particles were formed in the Aerosol Preparation and Characterization (APC) chamber and then transferred into the AIDA chamber.
- <sup>d</sup>: The nominal geometric size given by the manufacture Nanopartz Inc.
- <sup>e</sup>: Electrical mobility equivalent diameter,  $d_m$ , measured by a scanning mobility particle sizer (SMPS).
- <sup>f</sup>: The sizes ( $d_{va}$ ) of Diesel particles and Saharan desert dust 2 are average values with their standard deviation.
- <sup>g</sup>: Institute of Soil Landscape Research, Leibniz Centre for Agricultural Landscape Research, Germany.
- 15 <sup>h</sup>: Soil dust samples were dispersed by a rotating brush generator and injected via cyclones into the AIDA chamber.
- <sup>i</sup>: Department of Atmospheric Science, Colorado State University, Fort Collins, Colorado, USA.
- <sup>j</sup>: Samples, provided by Elena Gorokhova and Matt Salter at Stockholm University, they were prepared by diluting a pure *skeletonema marinoi* culture with artificial seawater (sigma sea salt) to conditions representative of a bloom in the ocean.

Table S2: Summary of peak assignments

| Cations  |                              |                                                             |                                                                                          | Anions |                             |                                                                                 |                                                  |
|----------|------------------------------|-------------------------------------------------------------|------------------------------------------------------------------------------------------|--------|-----------------------------|---------------------------------------------------------------------------------|--------------------------------------------------|
| m/z      | carbon                       | inorganic                                                   | organic                                                                                  | m/z    | carbon                      | inorganic                                                                       | organic                                          |
| 7+       |                              | Li <sup>+</sup>                                             |                                                                                          | 1-     |                             | H <sup>-</sup>                                                                  |                                                  |
| 12+      | C <sup>+</sup>               |                                                             |                                                                                          | 8-     |                             | O <sup>2-</sup>                                                                 |                                                  |
| 13+      |                              |                                                             | CH <sup>+</sup>                                                                          | 12-    | C <sup>-</sup>              |                                                                                 |                                                  |
| 15+      |                              |                                                             | CH <sub>3</sub> <sup>+</sup> /NH <sup>+</sup>                                            | 16-    |                             | O <sup>-</sup>                                                                  |                                                  |
| 17+      |                              | OH <sup>+</sup>                                             |                                                                                          | 17-    |                             | OH <sup>-</sup>                                                                 |                                                  |
| 18+      |                              | NH <sub>4</sub> <sup>+</sup> /H <sub>2</sub> O <sup>+</sup> |                                                                                          | 24-    | C <sub>2</sub> <sup>-</sup> |                                                                                 |                                                  |
| 23+      |                              | Na <sup>+</sup>                                             |                                                                                          | 25-    |                             |                                                                                 | C <sub>2</sub> H <sup>-</sup>                    |
| 24+      | C <sub>2</sub> <sup>+</sup>  | Mg <sup>+</sup>                                             |                                                                                          | 26-    |                             |                                                                                 | CN/C <sub>2</sub> H <sub>2</sub> <sup>-</sup>    |
| 27+      |                              | Al <sup>+</sup>                                             | C <sub>2</sub> H <sub>3</sub> <sup>+</sup>                                               | 32-    |                             | S <sup>-</sup>                                                                  |                                                  |
| 28+      |                              | Si <sup>+</sup>                                             | CO <sup>+</sup>                                                                          | 36-    | C <sub>3</sub> <sup>-</sup> |                                                                                 |                                                  |
| 29+      |                              |                                                             | C <sub>2</sub> H <sub>5</sub> <sup>+</sup> /CHO <sup>+</sup>                             | 35-    |                             | Cl <sup>-</sup>                                                                 |                                                  |
| 30+      |                              |                                                             | CH <sub>3</sub> NH <sup>+</sup> /CH <sub>2</sub> O <sup>+</sup>                          | 37-    |                             | Cl <sup>-</sup>                                                                 |                                                  |
| 36+      | C <sub>3</sub> <sup>+</sup>  | NO <sup>+</sup>                                             |                                                                                          | 42-    |                             |                                                                                 | CNO/C <sub>2</sub> H <sub>2</sub> O <sup>-</sup> |
| 39+      |                              | K <sup>+</sup>                                              | C <sub>3</sub> H <sub>3</sub> <sup>+</sup>                                               | 43-    |                             | AlO <sup>-</sup>                                                                |                                                  |
| 40+      |                              | Ca <sup>+</sup>                                             | C <sub>2</sub> O <sup>+</sup>                                                            | 45-    |                             |                                                                                 | COOH <sup>-</sup>                                |
| 41+      |                              | K <sup>+</sup>                                              | C <sub>3</sub> H <sub>5</sub> <sup>+</sup>                                               | 46-    |                             | NO <sub>2</sub> <sup>-</sup>                                                    |                                                  |
| 43+      |                              |                                                             | C <sub>3</sub> H <sub>7</sub> <sup>+</sup> /C <sub>2</sub> H <sub>3</sub> O <sup>+</sup> | 48-    | C <sub>4</sub> <sup>-</sup> | SO <sup>-</sup>                                                                 |                                                  |
| 44+      |                              | SiO <sup>+</sup>                                            | CO <sub>2</sub> <sup>+</sup>                                                             | 59-    |                             | AlO <sub>2</sub> <sup>-</sup>                                                   | CH <sub>2</sub> COOH <sup>-</sup>                |
| 46+      |                              | NO <sub>2</sub> <sup>+</sup>                                |                                                                                          | 60-    | C <sub>5</sub> <sup>-</sup> | SiO <sub>2</sub> <sup>-</sup>                                                   |                                                  |
| 48+      | C <sub>4</sub> <sup>+</sup>  |                                                             |                                                                                          | 62-    |                             | NO <sub>3</sub> <sup>-</sup>                                                    |                                                  |
| 51+      |                              |                                                             | C <sub>4</sub> H <sub>3</sub> <sup>+</sup>                                               | 63-    |                             | PO <sub>2</sub> <sup>-</sup>                                                    |                                                  |
| 53+      |                              |                                                             | C <sub>4</sub> H <sub>5</sub> <sup>+</sup>                                               | 64-    |                             | SO <sub>2</sub> <sup>-</sup>                                                    |                                                  |
| 54+      |                              | Fe <sup>+</sup>                                             |                                                                                          | 70-    |                             | <sup>35</sup> Cl <sub>2</sub> <sup>-</sup>                                      |                                                  |
| 55+      |                              | Mn <sup>+</sup>                                             | C <sub>4</sub> H <sub>7</sub> <sup>+</sup> /C <sub>3</sub> H <sub>3</sub> O <sup>+</sup> | 71-    |                             |                                                                                 | CCH <sub>2</sub> COOH <sup>-</sup>               |
| 56+      |                              | Fe/CaO/Si <sub>2</sub> <sup>+</sup>                         | C <sub>4</sub> H <sub>8</sub> <sup>+</sup>                                               | 72-    | C <sub>6</sub> <sup>-</sup> | FeO <sup>-</sup>                                                                |                                                  |
| 57+      |                              | CaOH <sup>+</sup>                                           | C <sub>4</sub> H <sub>9</sub> <sup>+</sup> /C <sub>2</sub> OOH <sup>+</sup>              | 73-    |                             |                                                                                 | C <sub>2</sub> H <sub>4</sub> COOH <sup>-</sup>  |
| 58+      |                              | Ni <sup>+</sup>                                             | C <sub>2</sub> H <sub>5</sub> -NH-CH <sub>2</sub> <sup>+</sup>                           | 76-    |                             | SiO <sub>3</sub> <sup>-</sup>                                                   |                                                  |
| 59+      |                              |                                                             | (CH <sub>3</sub> ) <sub>3</sub> N <sup>+</sup>                                           | 77-    |                             | HSiO <sub>3</sub> <sup>-</sup>                                                  |                                                  |
| 60+      | C <sub>5</sub> <sup>+</sup>  |                                                             |                                                                                          | 79-    |                             | PO <sub>3</sub> <sup>-</sup>                                                    |                                                  |
| 63+      |                              | Cu <sup>+</sup>                                             | C <sub>5</sub> H <sub>3</sub> <sup>+</sup>                                               | 80-    |                             | SO <sub>3</sub> <sup>-</sup>                                                    |                                                  |
| 64+      |                              | Zn <sup>+</sup>                                             |                                                                                          | 81-    |                             | HSO <sub>3</sub> <sup>-</sup>                                                   |                                                  |
| 65+      |                              | Cu <sup>+</sup>                                             |                                                                                          | 84-    | C <sub>7</sub> <sup>-</sup> |                                                                                 |                                                  |
| 66+      |                              | Zn <sup>+</sup>                                             |                                                                                          | 85-    |                             |                                                                                 | C <sub>3</sub> H <sub>4</sub> COOH <sup>-</sup>  |
| 69+      |                              |                                                             | C <sub>5</sub> H <sub>9</sub> <sup>+</sup>                                               | 86-    |                             | FeO <sub>2</sub> <sup>-</sup>                                                   |                                                  |
| 71+      |                              |                                                             | C <sub>4</sub> H <sub>7</sub> O <sup>+</sup>                                             | 88-    |                             | Si <sub>2</sub> O <sub>2</sub> <sup>-</sup> /FeO <sub>2</sub> <sup>-</sup>      |                                                  |
| 72+      | C <sub>6</sub> <sup>+</sup>  |                                                             |                                                                                          | 89-    |                             |                                                                                 | (CO) <sub>2</sub> OOH <sup>-</sup>               |
| 77+      |                              |                                                             | C <sub>6</sub> H <sub>5</sub> <sup>+</sup>                                               | 93-    |                             | NaCl <sub>2</sub> <sup>-</sup>                                                  |                                                  |
| 81+      |                              | Na <sub>2</sub> Cl <sup>+</sup>                             | C <sub>6</sub> H <sub>9</sub> <sup>+</sup>                                               | 95-    |                             | NaCl <sub>2</sub> <sup>-</sup> /PO <sub>4</sub> <sup>-</sup>                    |                                                  |
| 83+      |                              | Na <sub>2</sub> Cl <sup>+</sup>                             | C <sub>5</sub> H <sub>7</sub> O <sup>+</sup>                                             | 96-    | C <sub>8</sub> <sup>-</sup> | SO <sub>4</sub> <sup>-</sup>                                                    |                                                  |
| 84+      | C <sub>7</sub> <sup>+</sup>  |                                                             |                                                                                          | 97-    |                             | HSO <sub>4</sub> <sup>-</sup>                                                   |                                                  |
| 85+      |                              |                                                             | C <sub>7</sub> H <sub>5</sub> <sup>+</sup> /C <sub>3</sub> HO <sub>3</sub> <sup>+</sup>  | 99-    |                             |                                                                                 | C <sub>4</sub> H <sub>6</sub> COOH <sup>-</sup>  |
| 88+      |                              | FeO <sub>2</sub> <sup>+</sup>                               |                                                                                          | 103-   |                             | (AlO)SiO <sub>2</sub> <sup>-</sup>                                              |                                                  |
| 91+      |                              |                                                             | C <sub>7</sub> H <sub>7</sub> <sup>+</sup>                                               | 108-   | C <sub>9</sub> <sup>-</sup> |                                                                                 |                                                  |
| 95+      |                              |                                                             | C <sub>7</sub> H <sub>11</sub> <sup>+</sup>                                              | 109-   |                             | KCl <sub>2</sub> <sup>-</sup>                                                   |                                                  |
| 96+      | C <sub>8</sub> <sup>+</sup>  | Ca <sub>2</sub> O <sup>+</sup>                              |                                                                                          | 117-   |                             |                                                                                 | (CO) <sub>3</sub> OOH <sup>-</sup>               |
| 97+      |                              | KNaCl <sup>+</sup>                                          | C <sub>4</sub> HO <sub>3</sub> <sup>+</sup>                                              | 119-   |                             | AlSiO <sub>4</sub> <sup>-</sup> /NaSiO <sub>4</sub> <sup>-</sup>                |                                                  |
| 103+     |                              |                                                             | C <sub>8</sub> H <sub>7</sub> <sup>+</sup>                                               | 130-   |                             | NaCl <sub>3</sub> <sup>-</sup>                                                  |                                                  |
| 105+     |                              |                                                             | C <sub>8</sub> H <sub>9</sub> <sup>+</sup>                                               | 135-   |                             | KSO <sub>4</sub> <sup>-</sup>                                                   |                                                  |
| 108+     | C <sub>9</sub> <sup>+</sup>  |                                                             |                                                                                          | 136-   |                             | (SiO <sub>2</sub> ) <sub>2</sub> O <sup>-</sup> /KHSO <sub>4</sub> <sup>-</sup> |                                                  |
| 112+     |                              | (CaO) <sub>2</sub> <sup>+</sup>                             |                                                                                          | 148-   |                             | (SiO <sub>2</sub> ) <sub>2</sub> Si <sup>-</sup>                                |                                                  |
| 113+     |                              | K <sub>2</sub> Cl <sup>+</sup>                              |                                                                                          | 151-   |                             | Na <sub>2</sub> Cl <sub>3</sub> <sup>-</sup>                                    |                                                  |
| 115+     |                              | K <sub>2</sub> Cl <sup>+</sup>                              | C <sub>9</sub> H <sub>7</sub> <sup>+</sup>                                               | 153-   |                             | Na <sub>2</sub> Cl <sub>3</sub> <sup>-</sup>                                    |                                                  |
| 120+     | C <sub>10</sub>              |                                                             |                                                                                          | 179-   |                             | AlSiO <sub>4</sub> .SiO <sub>2</sub> <sup>-</sup>                               |                                                  |
| 132+     | C <sub>11</sub> <sup>+</sup> |                                                             |                                                                                          |        |                             |                                                                                 |                                                  |
| 206–208+ |                              | Pb <sup>+</sup>                                             |                                                                                          |        |                             |                                                                                 |                                                  |

21 **Table S3: Codes for reference particle types used for classification by using the reference-spectra based method**

| positive code | reference particle                                | negative code | reference particle                                |
|---------------|---------------------------------------------------|---------------|---------------------------------------------------|
| 01            | Ammonium Nitrate<br>(AN)                          | 01            | Ammonium Nitrate and Sulfate<br>(AN+AS)           |
| 02            | Pinonic Acid<br>(PinoA)                           | 02            | Ammonium Nitrate and Potassium Sulfate<br>(AN+PS) |
| 03            | Oxalic Acid<br>(OA)                               | 03            | Desert Dust (Morroco)<br>(MD)                     |
| 04            | Ammonium Nitrate and Potassium Sulfate<br>(AN+PS) | 04            | Urban Dust<br>(UD)                                |
| 05            | Potassium Sulfate Coated PSL<br>(PSL+PS)          | 05            | Arable Soil Dust (German)<br>(SDGe01)             |
| 06            | Agricultural Soil Dust<br>(ASD)                   | 06            | Diesel Soot<br>(DS)                               |
| 07            | Diesel Soot<br>(DS)                               | 07            | Biomass Burning Soot<br>(BS)                      |
| 08            | Biomass Burning Soot<br>(BS)                      |               |                                                   |
| 09            | Sea salt (pure)<br>(SS)                           |               |                                                   |
| 10            | Fuzzy Class 6_Calcium rich                        |               |                                                   |

22

23 Note: In order to minimize the complexity, the reference number was reduced by observing the histogram of particle types based on the

24 correlation between each ambient spectrum (7314 in total) and our 32 laboratory based reference spectra relevant for atmospheric aerosol

25 (refer to the details of reference spectra-oriented grouping procedure after Fig. S13 in the supplementary information).

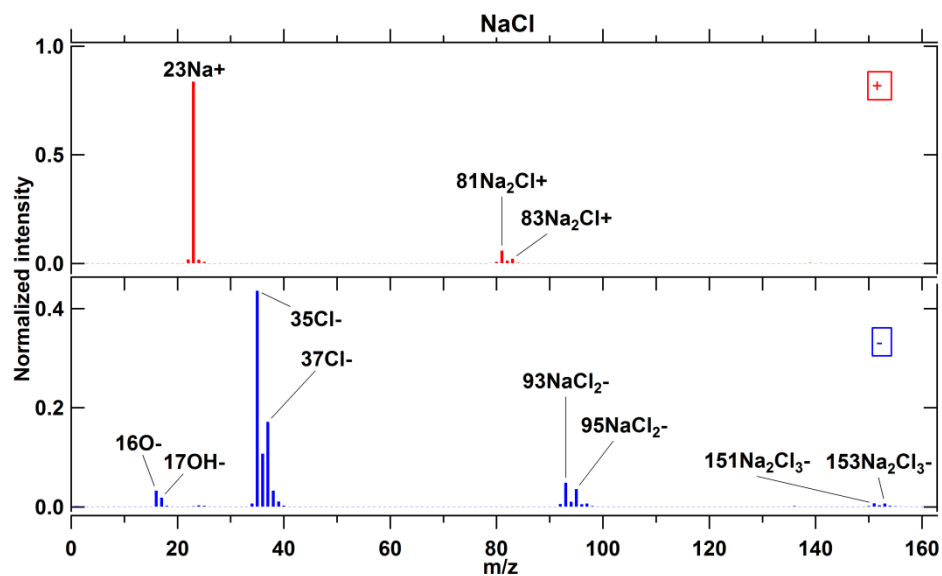

Figure S1: Average mass spectrum for 1170 nm ( $d_{va}$ ) pure NaCl particles. The ratio of  $m/z$  35  $Cl^-$  to  $m/z$  37  $Cl^-$  is  $\sim 3.2$ , similar as the natural isotopic ratio of  $\sim 3.1$  for  $^{35}Cl/^{37}Cl$ . 250 single particle mass spectra were averaged for this spectrum.

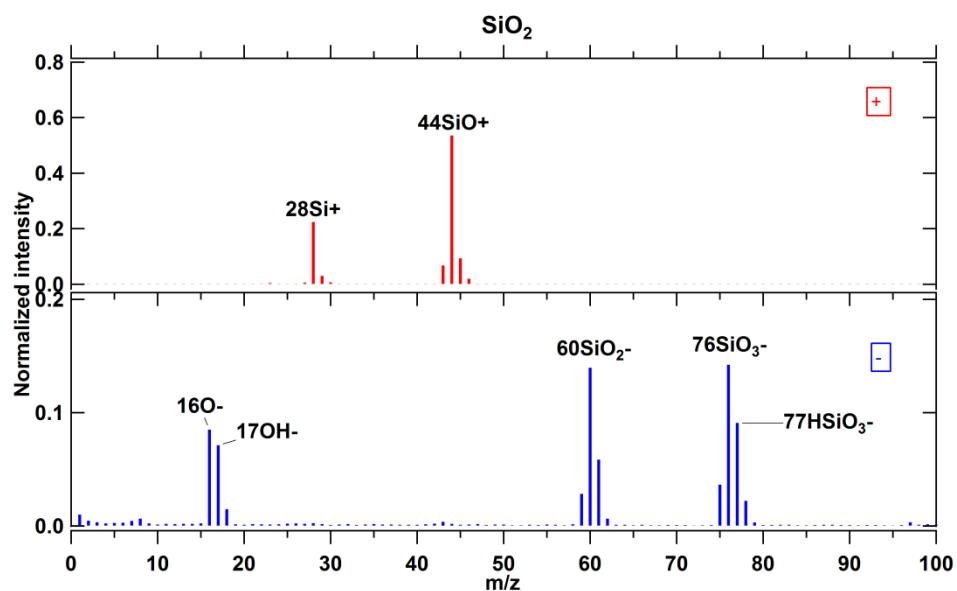

Figure S2: Average mass spectrum for 2097 nm ( $d_{va}$ )  $SiO_2$  particles (glass beads). The ratio of  $m/z$  44  $SiO^+$  to  $m/z$  28  $Si^+$  is  $\sim 2.4$ ; ( $m/z$  76  $SiO_3^-$  +  $m/z$  77  $HSiO_3^-$ ) to  $m/z$  60  $SiO_2^-$  is  $\sim 1$ . Such peak ratios are typical for  $SiO_2$  particles. 347 single particle mass spectra were averaged for this spectrum.

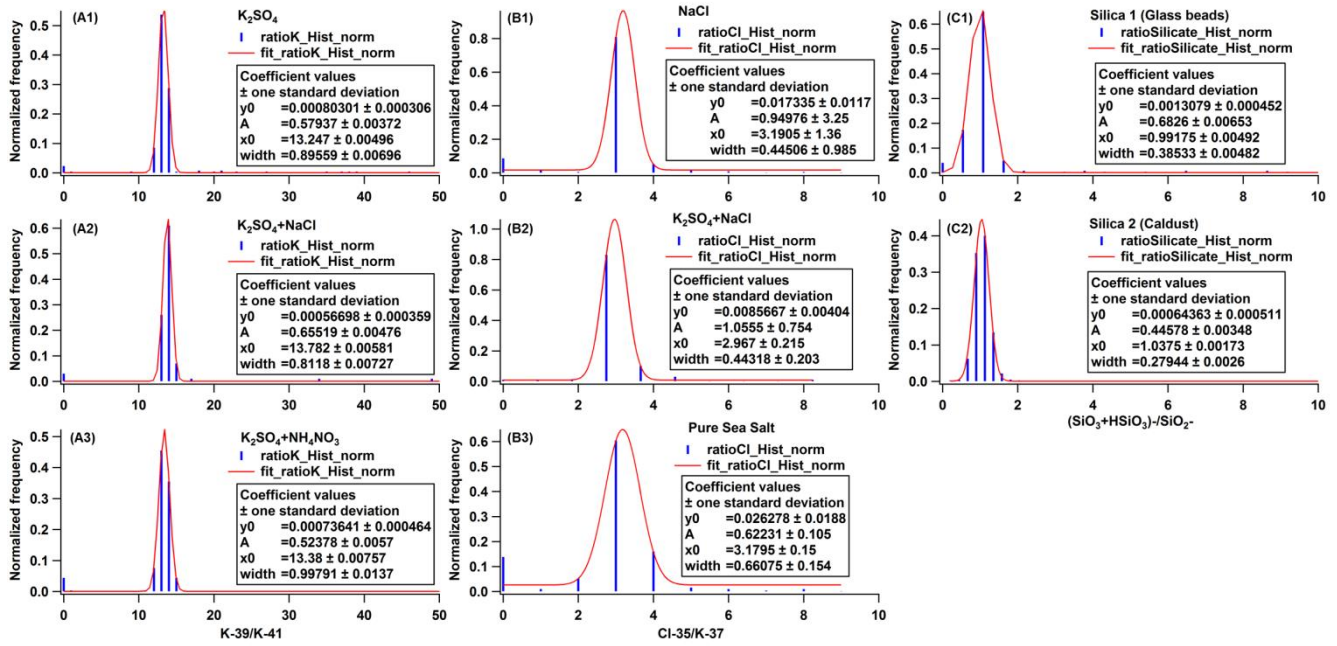

37 **Figure S3: Histogram of peak ratios for different particle samples: panel A1 to A3 are for the isotopic ratio of K-39/K-41 arising**  
 38 **from K containing samples; panel B1 to B3 are for the isotopic ratio of Cl-35/Cl-37 arising from Cl containing samples; panel C1**  
 39 **and C2 are for the peak ratio of (SiO<sub>3</sub>+HSiO<sub>3</sub><sup>-</sup>)/SiO<sub>2</sub><sup>-</sup> arising from silicate containing samples.**

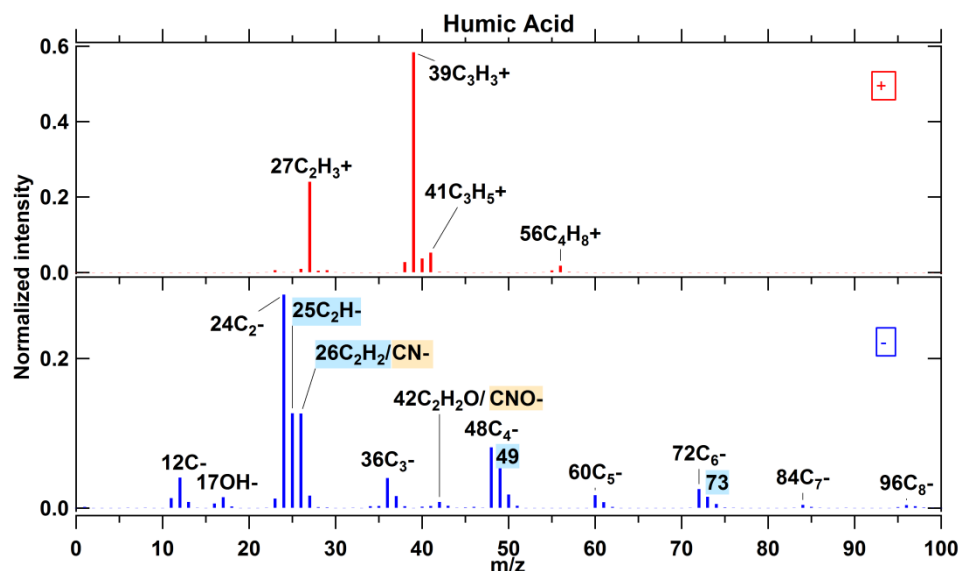

Figure S4: Average mass spectrum for 1221 nm ( $d_{va}$ ) humic acid particles. Fragments labelled in blue are typical for unsaturated organic compounds; fragments labelled in orange are from nitrogen-containing organic compounds. 773 single particle mass spectra were averaged for this spectrum.

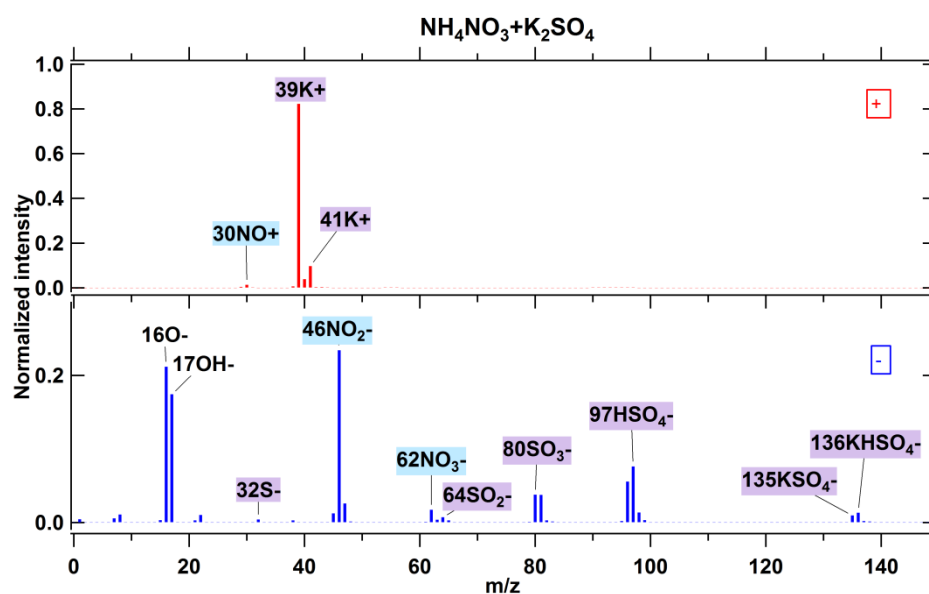

Figure S5: Average mass spectrum for 854 nm ( $d_{va}$ ) particles of homogeneous internal mixtures of inorganic compounds,  $\text{NH}_4\text{NO}_3$  and  $\text{K}_2\text{SO}_4$ , 576 single spectra averaged. The blue and purple labels represent the fragments arising from pure  $\text{NH}_4\text{NO}_3$  and pure  $\text{K}_2\text{SO}_4$  components, respectively.

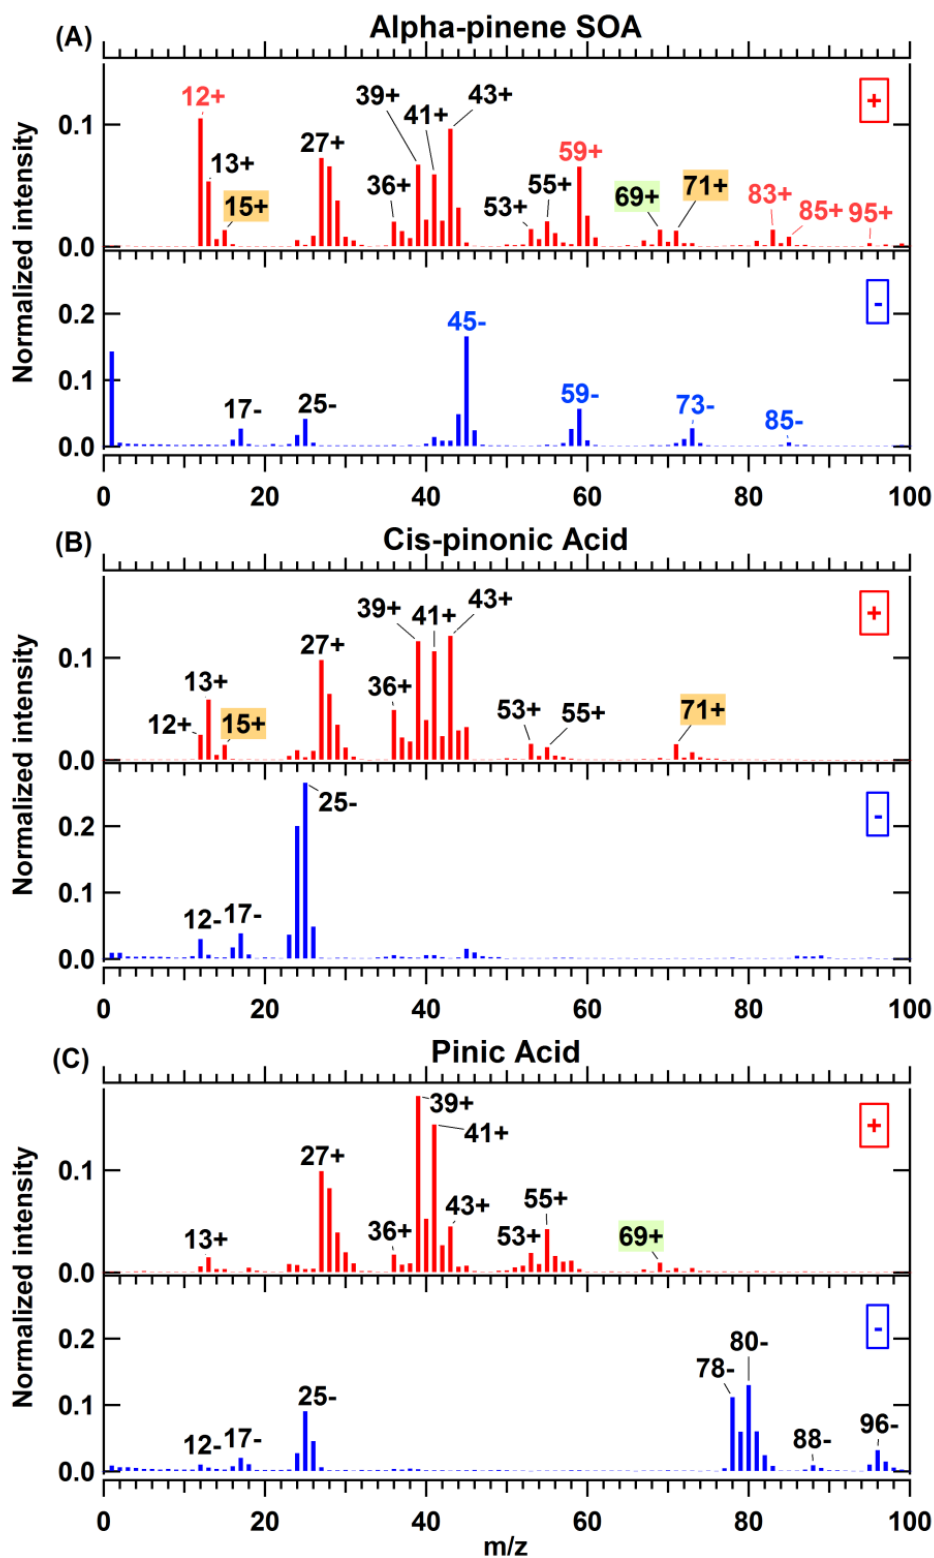

Figure S6: Average mass spectra for particles of homogeneous internal mixtures of (A) secondary organic aerosol (SOA) particles from  $\alpha$ -pinene ozonolysis, which was performed in the APC chamber then the resulting particles were transferred into AIDA chamber at 263 K and 95% RH,  $d_{va}$  = 505 nm, 1938 single spectra averaged, as well as pure aerosol particles consisting of (B) cis-pinonic acid,  $d_{va}$  = 702 nm, 600 single spectra averaged and (C) pinic acid,  $d_{va}$  = 902 nm, 683 single spectra averaged. In panel (A),  $m/z$  15<sup>+</sup> and 71<sup>+</sup> labelled in orange are arising from cis-pinonic acid, while  $m/z$  69<sup>+</sup> labelled in green is arising from pinic acid.



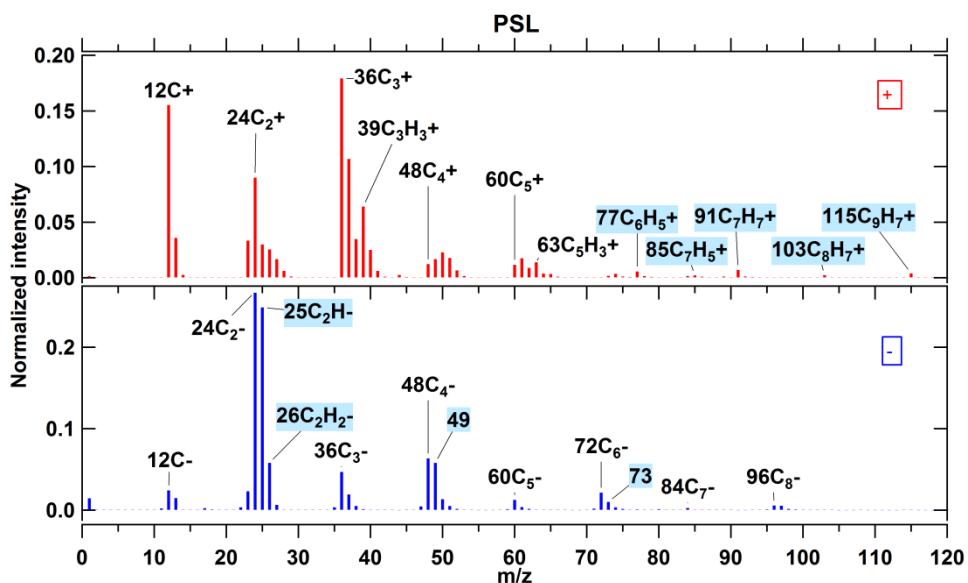

Figure S7: Average mass spectra for 818 nm ( $d_{va}$ ) pure PSL. Fragments labelled in blue are typical patterns for aromatic compounds. 235 single particle mass spectra were averaged for this spectrum.

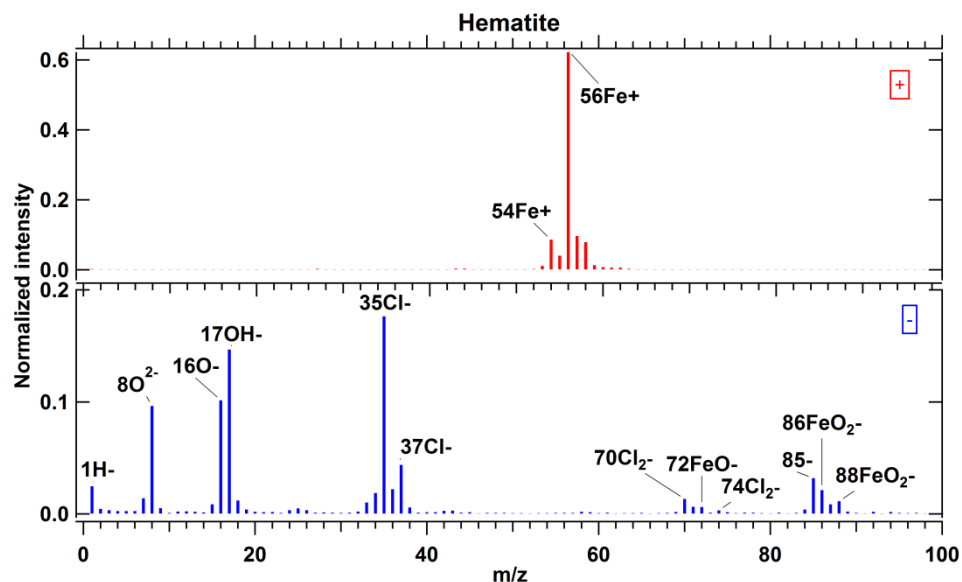

Figure S8: Average mass spectrum for 800 nm (geometric size) hematite particles, 320 single spectra averaged.

Hematite with signatures for iron (intensive  $m/z$  56  $Fe^+$  and the other iron isotopes  $m/z$  54, 57, and 58), oxides of iron ( $m/z$  72  $FeO^-$ , 86  $FeO_2^-$ , and 88  $FeO_2^-$ ), and chlorides ( $m/z$  35  $Cl^-$ , 37  $Cl^-$ , 70  $Cl_2^-$ , and 74  $Cl_2^-$ ). Chloride ions observed originate from the hematite synthesis process. This is comparable to the hematite spectra measured by PALMS (Gallavardin et al., 2008).

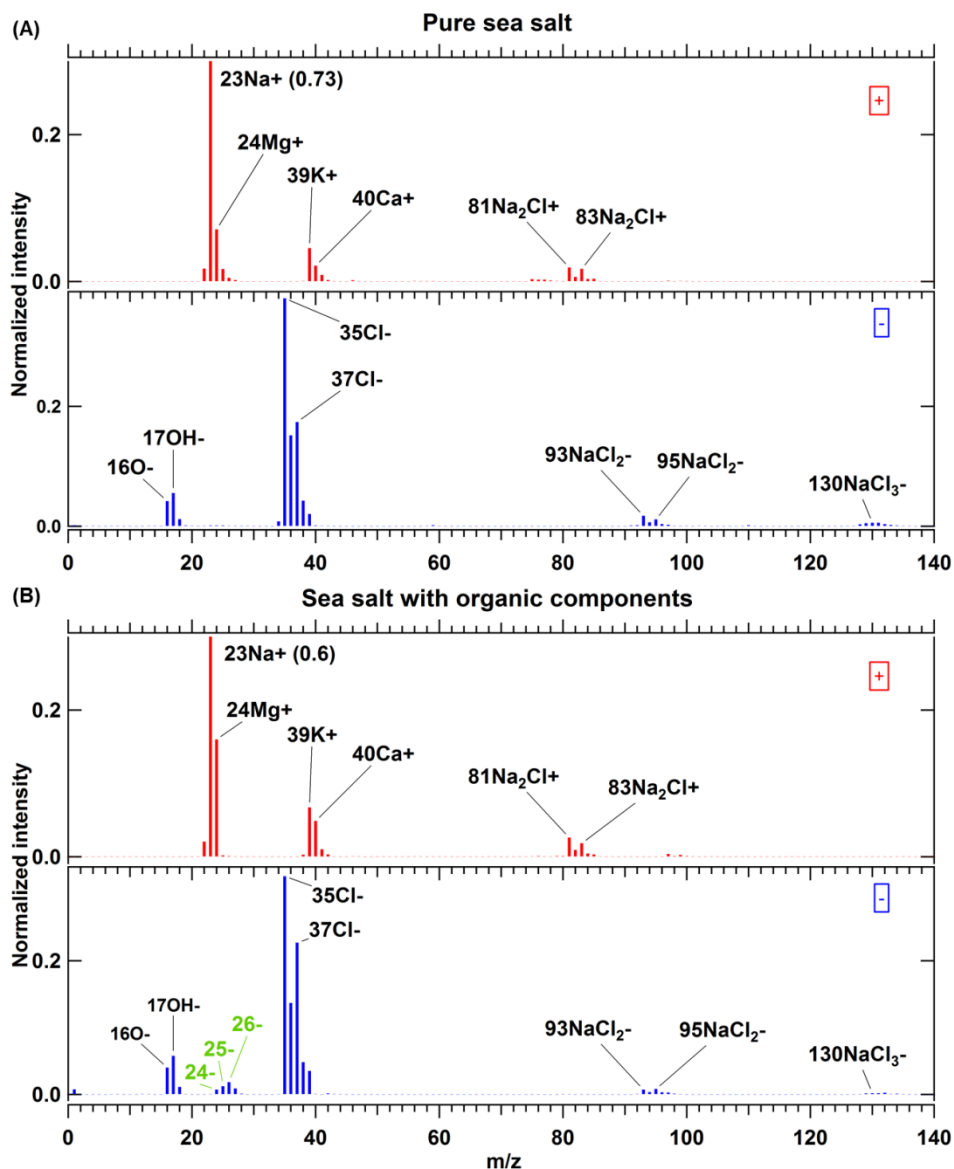

Figure S9: Average mass spectra for (A) pure sea salt, 422 single spectra averaged, and (B) sea salt particles with *skeletonema marinoi* (organic components), 526 single spectra averaged. These aerosol particles were sampled from the AIDA chamber at 246 K and 75% RH,  $d_{va} \sim 1200$  nm. The numbers in brackets beside peaks 23<sup>+</sup> are the exact intensity values for them. In panel (B) obvious organic signatures m/z 24<sup>-</sup>, 25<sup>-</sup>, and 26<sup>-</sup> labelled in green can be observed.

Pure sea salt particles have signatures for NaCl (m/z 23<sup>+</sup>, 81<sup>+</sup>, 83<sup>+</sup>, 35<sup>-</sup>, 37<sup>-</sup>, 93<sup>-</sup>, and 95<sup>-</sup>), and other metals (m/z 24 Mg<sup>+</sup>, 39 K<sup>+</sup>, and 40 Ca<sup>+</sup>). Sea salt particles containing biological components have the signatures for pure sea salt as well as the signatures for organic compounds (m/z 24<sup>-</sup>, 25<sup>-</sup>, and 26<sup>-</sup>).

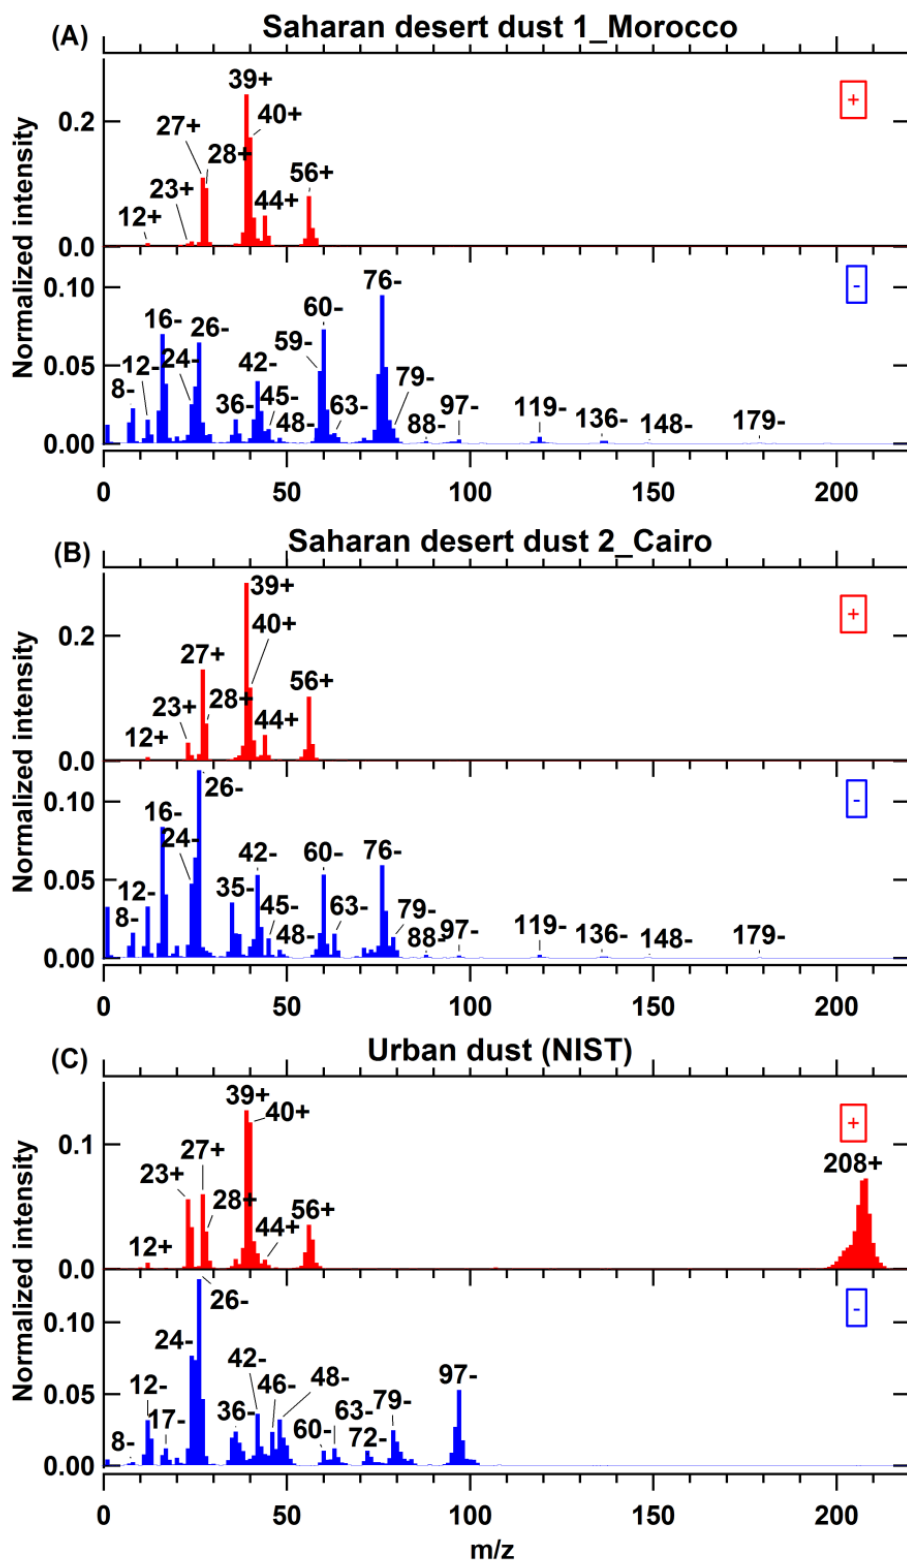

Figure S10: Average mass spectra for Saharan desert dust from (A) Morocco, 338 single spectra averaged and (B) Cairo city, 396 single spectra averaged, and (C) urban dust (standard material from NIST), 375 single spectra averaged.

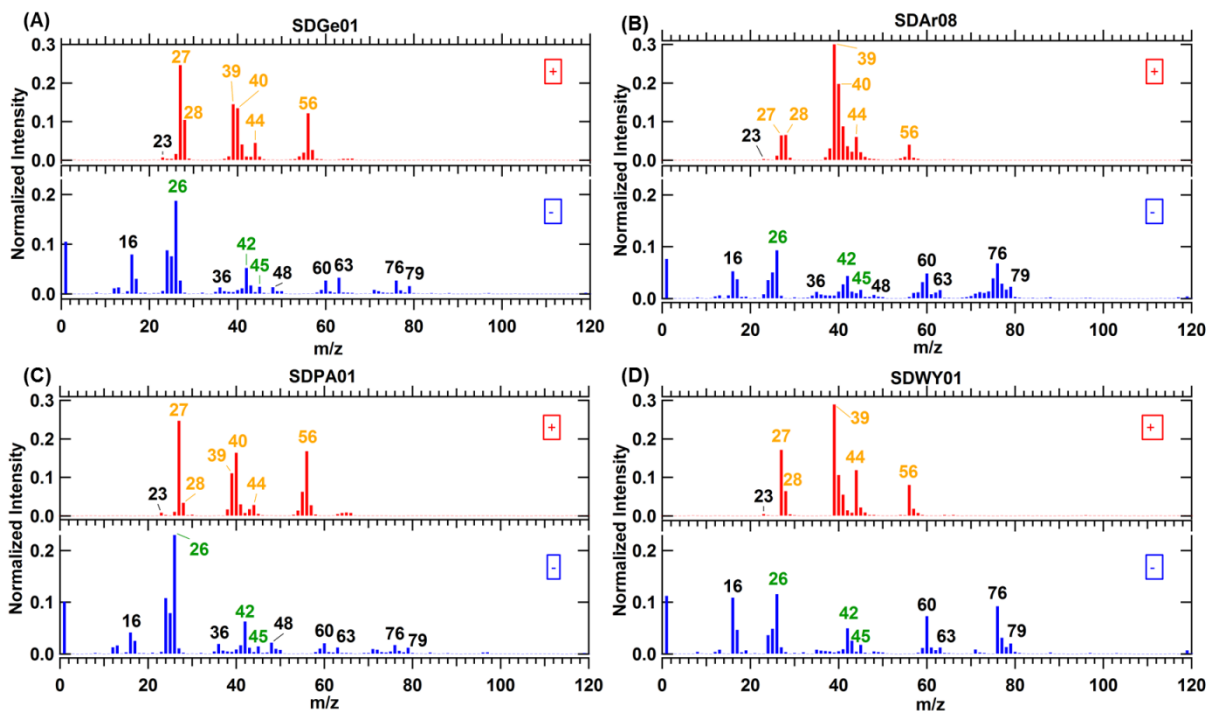

Figure S11: Average mass spectra for four different arable soil dusts sampled at two sites from Germany (SDGe01 is from Gottesgabe and SDPA01 is from Paulinenaue), Argentina (SDAr08), and Wyoming in USA (SDWY01). The corresponding aerosol particles were dispersed by a rotating brush generator and injected via cyclones into the AIDA chamber at 256 K and 80% RH. Black tags represent inorganic fragments; green tags represent organic fragments; orange tags represent fragments originating from inorganic and organic species. The numbers of spectra for each average spectrum are 583 (A), 592 (B), 385 (C) and 623 (D).

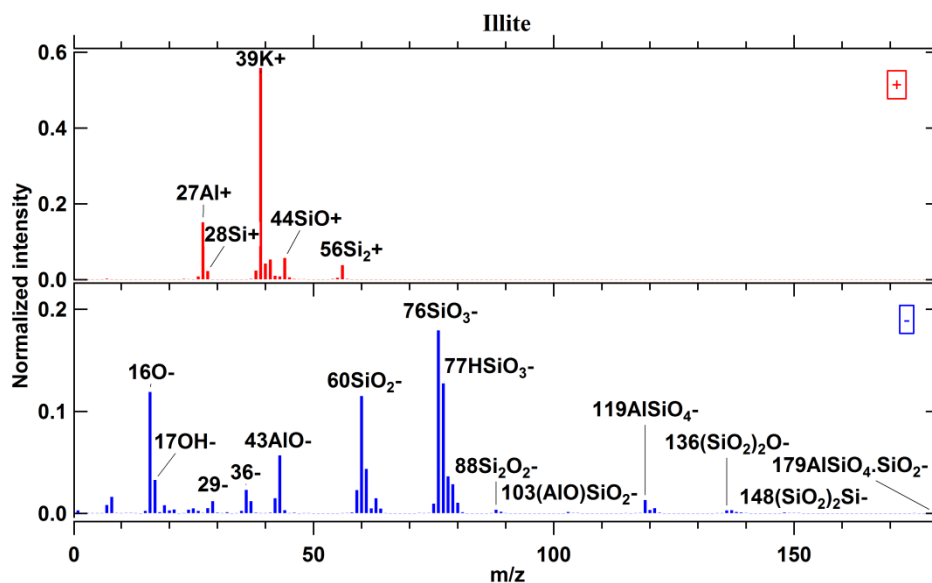

Figure S12: Average mass spectra for illite particles, 807 single spectra averaged

Illite particles, mainly containing aluminosilicates, showed signatures for potassium ( $m/z$  39  $K^+$  and 41  $K^+$ ), alumina ( $m/z$  27  $Al^+$ , 43  $AlO^-$ , and 59  $AlO_2^-$ ), silica ( $m/z$  28  $Si^+$ , 44  $SiO^+$ , 56  $Si_2^+$ , 60  $SiO_2^-$ , 76  $SiO_3^-$ , 77  $HSiO_3^-$ , 136  $(SiO_2)_2O^-$ , and 148  $(SiO_2)_2Si^-$ ), and oxides of aluminium and silicon ( $m/z$  119  $AlSiO_4^-$ , and 179  $AlSiO_4.SiO_2^-$ ). The K/Si ratio is  $\sim 25$ , which is comparable to this ratio observed in Illite spectra measured by PALMS (Zawadowicz et al., 2017).

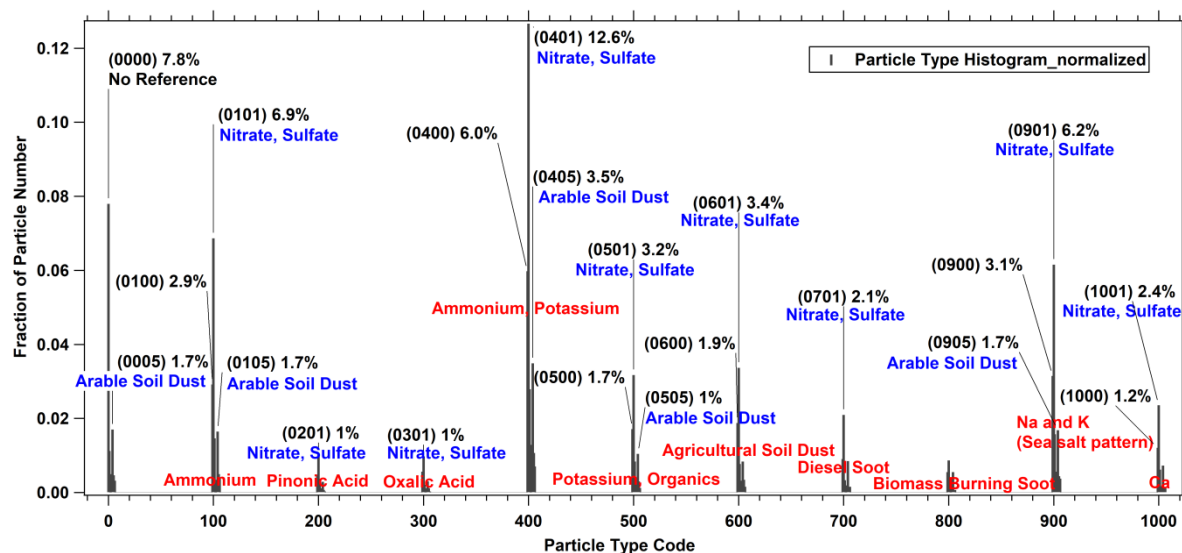

Figure S13: Particle type histogram based on the classification of field data (on July 29<sup>th</sup>, 2016 during TRAM01 campaign) according to laboratory-based reference spectra. The numbers in the brackets are the combination of positive (the front two digits) and negative codes (the rear two digits) for reference particles, which are listed in Table S3. There are 11 clusters in this plot with 10 positive references labelled in red texts, while the corresponding negative references are labelled in blue texts beneath the corresponding codes.

## 98 Procedures for LAAPTOF data analysis with an emphasize on mass calibration

- 99 1. Open two Igor experiments, using the same raw data (One is for comparison, another is for further analysis)
- 100 2. In one Igor experiment: go through the raw spectra (e.g. from the negative spectra,  $m/z$  1, 16 and 17, 24, 25 and 26 are
- 101 easier to be recognized), to find out the possible fragments, with the help of peak assignments in Table 1 as well as the
- 102 laboratory based reference spectra.
- 103 3. In another Igor experiment
- 104 • Setting the First-tof, base line, and remove the empty spectra
  - 105 • Start mass calibration
- 106 Step1: Choose 3 masses with relative bigger distance for positive and negative spectra for basic calibration, respectively.
- 107 (Tips: it is better to choose the corresponding positions for such masses in the spectrum # -1 after pressing the tab
- 108 “Display spectrum”, which give us the stack spectra showing the shift, thus help us better locate the mass; double
- 109 check the mass values referring to the other Igor experiment with only raw data)
- 110 Step2: Exact calibration, by using more masses.
- 111 (Tips: use only values which are certain)
- 112 Step3: Generate and check the average spectra, then adjust mass calibration by experience and comparing with the
- 113 individual spectrum.
- 114 (Tips: If we have done good mass calibration, the resulting average spectra will be representative, which can help
- 115 to find more fragments including reasonable patterns like  $m/z$  24<sup>-</sup>, 25<sup>-</sup>, and 26<sup>-</sup> as well as some expected small
- 116 fragments like  $m/z$  119<sup>-</sup> in mineral dust, thus can modify the exact calibration table. Otherwise, we should redo
- 117 mass calibration from step 1)
- 118 Step4: Plot ptof vs masses for mass calibration, then use power fit to see whether the value is around 0.5, if yes, then the
- 119 mass calibration is ok.
- 120 Step5: If the data is poly dispersed, we can also use fuzzy classification to double check the mass calibration.
- 121 (Tips: If we have good mass calibration, the fuzzy results will be good, namely the real number of output classes
- 122 can finally (almost) equal to the input class number)
- 123 4. Generate average spectra that are normalized to the sum of ion intensities
- 124 5. Fuzzy Clustering
- 125 For poly-dispersed particles, we can use Fuzzy classification method. The most important input parameter is the number
- 126 of classes. We can start from the bigger value (e.g. 20) to the smaller one, until the reasonable number and corresponding
- 127 classes are found. In this study 6 classes have been found by using this method.
- 128 (Tips: similar classes would be observed if the input number of classes is too big, and the good situation is that the resulting
- 129 number of classes we found is equal to the input number, which is 6 in this study. In addition, the resulting number of
- 130 classes with clearly different features strongly depends on the experience of the operating scientist to identify them.)
- 131 It should be noted that there is problematic peak shift regarding to the mass calibration, mainly due to the interaction position
- 132 of the individual particles with the excimer laser beam. Peak shifting problem cannot be completely solved even after
- 133 aforementioned serious mass calibration.

134 **Procedures for reference spectra-oriented grouping of mass spectra**

- 135 1. Prepare normalized (to sum) stick spectra from the field data, as well as the reference spectra  
136 2. Correlate each spectrum to the references  
137 3. Define particle type by using Pearson's correlation coefficients (r)  
138 For each particle, find out the maximum r for both positive and negative spectra, and corresponding particle codes (e.g.  
139 00 to 32 at first; 00 represents that this particle does not correlate with any reference). Each spectrum belongs to only one  
140 type.  
141 4. Reduce the number of references by observing the histogram of particle types, in order to minimize the complexity caused  
142 by excessive meticulous classification.  
143 5. Repeat step 1 to 3  
144 6. Group particles into different types  
145 Make histogram of particle types and find out the main ones, then make average spectra for the types chosen and compare  
146 them, and redefine particle types.  
147

148 **The equation (S1) for calculating Pearson's correlation coefficients between two waves A and B (e.g. ambient and**  
149 **reference spectrum)**

150 
$$r = \frac{\sum_{i=0}^{n-1} (waveA[i] - A)(waveB[i] - B)}{\sqrt{\sum_{i=0}^{n-1} (waveA[i] - A)^2 \sum_{i=0}^{n-1} (waveB[i] - B)^2}}$$
 (S1)

151 Here A is the average of the elements in wave A, B is the average of the elements of wave B and the sum is over all wave  
152 elements. Although we mainly discuss the main peaks with higher intensities, in this paper, it is should be mentioned that the  
153 bias by the peak intensity in calculating r are inevitable, namely high intensive peaks dominate the value of r. Of course this  
154 intensity bias can be reduced by selecting specific mass ranges for the correlation.

## 155     **Uncertainties for reference-oriented method for grouping mass spectra**

156     In order to estimate the uncertainty for reference-oriented method, we have calculated the relative difference between the  
 157     highest and the second highest Pearson's correlation coefficients (r1 and r2) for each particle, according to equation (S2):

$$158 \quad \text{Relative Difference} = \frac{r1-r2}{r1} = \frac{r1_{\text{pos}} \times r1_{\text{neg}} - r2_{\text{pos}} \times r2_{\text{neg}}}{r1_{\text{pos}} \times r1_{\text{neg}}} \quad (\text{S2})$$

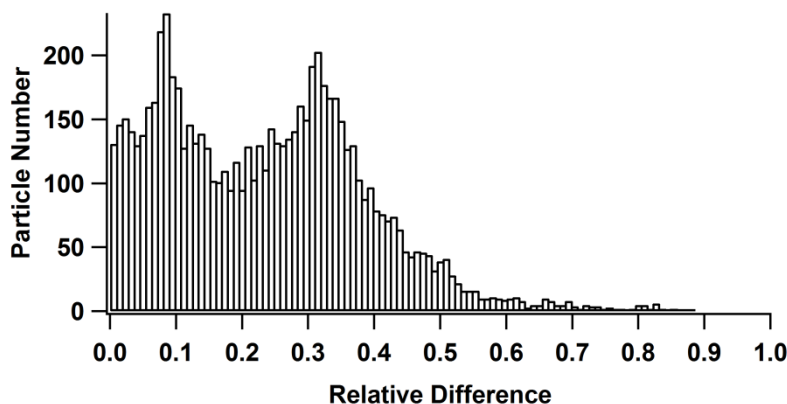

159  
 160     **Figure S14: Histogram of relative difference between the highest and the second highest Pearson's correlation coefficient values for**  
 161     **each particle measured in the field (on July 29th, 2016 during TRAM01 campaign).**

162  
 163     The corresponding statistic calculation results for such relative difference data are listed as follows:

164     V\_npnts= 7314; V\_numNaNs= 0; V\_numINFs= 0; V\_avg= 0.234484;

165     V\_Sum= 1715.02; V\_sdev= 0.152986; V\_sem= 0.00178885;

166     V\_rms= 0.279972; V\_adev= 0.126782; V\_skew= 0.595888;

167     V\_kurt= 0.244212; V\_minloc= 2005; V\_maxloc= 5211;

168     V\_min= 4.35069e-05; V\_max= 0.882732; V\_minRowLoc= 2005;

169     V\_maxRowLoc= 5211; V\_startRow= 0; V\_endRow= 7313;

170     The relative difference mentioned above provides information about the uncertainties for using the reference-spectra oriented  
 171     method, namely, the bigger the difference is, the smaller the uncertainty will be. It turns out that 77% of the 7314 particles we  
 172     measured have more than 10% relative difference between r1 and r2, therefore such classification method is reasonable to be  
 173     used.

174     There are some factors that could have impact on the uncertainties: 1) the most important one is selection of reference spectra,  
 175     since two similar references such German soil dust SDGe01 and SDPA01 will lead to similar r that cause little relative  
 176     difference between r1 and r2 corresponds to higher uncertainty. 2) Peak intensities and mass ranges selected will influence the  
 177     r values. Bias by peak intensities leads to higher uncertainties whereas well selected mass ranges can also reduce the  
 178     uncertainties.



## 179 Seeking lead (Pb) containing particles using the reference-spectra oriented method

180 In order to pick out the lead-containing particles, we firstly check the fuzzy results by correlating them to all the reference  
 181 spectra in the size range of 200 to 220. As shown in Figure S15, all the classes except class 5 have significant correlation with  
 182 the lead-containing urban dust particles (NIST), which can also be seen in Figure S16 where the corresponding spectra are  
 183 stacked, showing clear comparable data points in the  $m/z$  range of 200 to 220. For Class 5, there are some points offset, leading  
 184 to lower  $r$ , although it also shows similar shape in such  $m/z$  range. In the future we will modify our procedure to do better mass  
 185 calibration and avoid the offset/error data points to solve such problem. Another problematic issue, which cannot completely  
 186 solved at present, is the peak shifting mentioned before, especially for the fragments with bigger mass, such as lead. This will  
 187 make data interpretation more difficult. In the next step, we correlate each spectrum with the urban dust particles in the  $m/z$   
 188 range of 200 to 220, and the Pb-containing particles can be selected based on the criteria of  $r \geq 0.6$ . As a result, 55 Pb-  
 189 containing particles have been found among 7314 particles in the ambient data. Of course also other specific particles can be  
 190 found using suitable reference spectra.

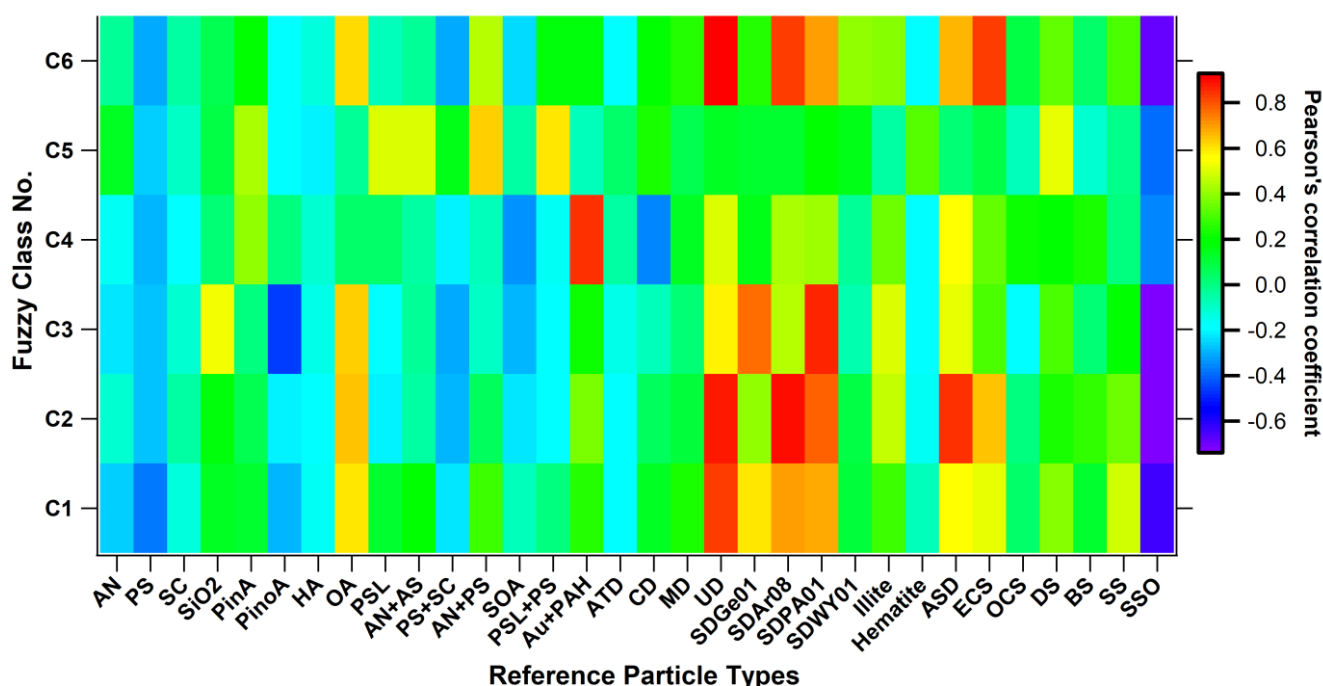

191  
 192 **Figure S15: Correlation between fuzzy classification results (6 classes, C1 to C6) and laboratory-based reference spectra only in the**  
 193  **$m/z$  range of 200 to 220 for the positive spectra. AN is short for ammonium nitrate, PS-potassium sulfate, SC-sodium chloride, PinA-**  
 194 **pinic acid, Pino-pinonic acid, HA-humid acid, OA-oxalic acid, ATD-Arizona test dust, CD-Cairo dust, MD-Morroco dust, UD-urban**  
 195 **dust, SDGe01 and SDPA01-soil dusts sampled at two sites from Germany, SDAr08- soil dust from Argentina, SDWY01-soil dust**  
 196 **from Wyoming in USA, ASD-agricultural soil dust, ECS-EC rich soot1, OCS-OC rich soot1, DS- diesel soot, BS- biomass burning**  
 197 **soot, which is the lignocellulosic char from Chestnut wood, SS-pure sea salt, SSO-sea salt with organics.**

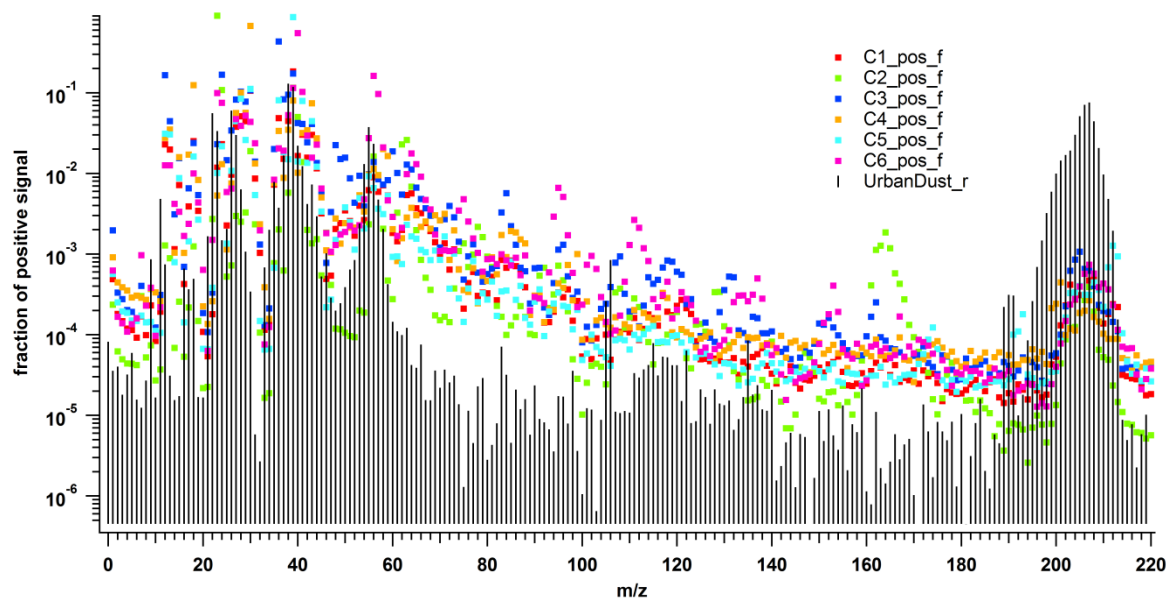

Figure S16: Stacked mass spectra for urban dust particles (NIST) and 5 classes of particles measured on July 29th, 2016 during the field campaign TRAM01.

## References

- Gallavardin, S., Lohmann, U., and Cziczo, D.: Analysis and differentiation of mineral dust by single particle laser mass spectrometry, *Int J Mass Spectrom*, 274, 56–63, 2008.
- Zawadowicz, M. A., Froyd, K. D., Murphy, D., and Cziczo, D. J.: Improved identification of primary biological aerosol particles using single particle mass spectrometry, *Atmos Chem Phys*, 17, 7193–7212, 2017.
